# Supplementary material for: A multiplex serologic platform for diagnosis of tick-borne diseases
Source: PubMed Central journal article supplement (PMC5816631; doi:10.1038/s41598-018-21349-2), 2018-02-16
Supplement: 41598_2018_21349_MOESM1_ESM.pdf [file 41598_2018_21349_MOESM1_ESM.pdf]

## **Supplementary Information**

A multiplex serologic platform for diagnosis of tick-borne diseases

Rafal Tokarz, Nischay Mishra, Teresa Tagliafierro, Stephen Sameroff, Adrian Caciula, Lokendrasingh Chauhan, Jigar Patel, Eric Sullivan, Azad Gucwa, Brian Fallon, Marc Golightly, Claudia Molins, Martin Schriefer, Adriana Marques, Thomas Briese, W. Ian Lipkin

**Supplementary Table 1.** List of early Lyme disease samples analyzed on the TBD-Serochip

| Sample  | WB IgM | WB IgM bands | WB IgG | WB IgG bands | C6 index CII | VisE | FlaB | OspC Nt | OspC type K | OspC type M | P100 | BBK07 | Bdr | OppA | BBO03 |
|---------|--------|--------------|--------|--------------|--------------|------|------|---------|-------------|-------------|------|-------|-----|------|-------|
| RTS-900 | POS    | 2 BANDS      | NEG    | 0 BANDS      | .34          |      |      |         |             |             |      |       |     |      | +     |
| RTS-901 | POS    | 2 BANDS      | NEG    | 0 BANDS      | 1.38         |      |      |         |             |             |      | +     | +   | +    |       |
| RTS-902 | POS    | 3 BANDS      | NEG    | 0 BANDS      | 7.78         | +    |      |         |             |             |      | +     |     |      |       |
| RTS-903 | POS    | 3 BANDS      | NEG    | 1 BAND       | 7.39         | +    | +    |         |             |             |      |       |     |      |       |
| RTS-904 | POS    | 2 BANDS      | NEG    | 1 BAND       | 1.3          |      | +    |         | +           |             |      |       |     |      |       |
| RTS-905 | POS    | 2 BANDS      | NEG    | 1 BAND       | 1.15         |      |      |         |             |             |      |       |     | +    |       |
| RTS-906 | POS    | 2 BANDS      | NEG    | 1 BAND       | 0.25         |      |      |         |             |             |      |       |     |      | +     |
| RTS-907 | POS    | 2 BANDS      | NEG    | 1 BAND       | 8.2          | +    |      |         |             |             |      |       |     |      |       |
| RTS-908 | POS    | 2 BANDS      | NEG    | 1 BAND       | 1.4          | +    |      |         |             |             |      |       |     |      |       |
| RTS-909 | POS    | 2 BANDS      | NEG    | 2 BANDS      | 1.51         | +    | +    | +       |             |             |      |       |     |      |       |
| RTS-910 | POS    | 2 BANDS      | NEG    | 2 BANDS      | 3.61         | +    |      |         |             |             |      | +     |     |      |       |
| RTS-911 | POS    | 2 BANDS      | NEG    | 3 BANDS      | N.D.         | +    |      |         |             |             |      | +     | +   |      |       |
| RTS-912 | POS    | 2 BANDS      | NEG    | 4 BANDS      | 2.38         | +    |      |         |             |             |      | +     |     |      |       |
| RTS-201 | POS    | <i>na</i>    | NEG    | <i>na</i>    | ND           | +    | +    |         |             |             |      |       |     |      |       |
| RTS-600 | POS    | <i>na</i>    | NEG    | <i>na</i>    | ND           | +    | +    |         | +           |             |      | +     |     | +    |       |
| RTS-602 | POS    | <i>na</i>    | NEG    | <i>na</i>    | 0.61         |      |      |         |             |             |      |       | +   |      |       |
| RTS-604 | NEG    | <i>na</i>    | NEG    | <i>na</i>    | .39          |      |      |         |             |             |      | +     |     |      |       |
| RTS-606 | POS    | <i>na</i>    | NEG    | <i>na</i>    | ND           |      |      |         |             |             | +    |       |     |      | +     |
| RTS-607 | POS    | <i>na</i>    | NEG    | <i>na</i>    | ND           | +    |      |         |             |             |      |       |     |      |       |
| RTS-609 | POS    | <i>na</i>    | NEG    | <i>na</i>    | ND           | +    |      |         |             |             |      |       |     |      |       |
| RTS-614 | POS    | <i>na</i>    | NEG    | <i>na</i>    | .99          |      |      | +       |             |             | +    |       |     |      |       |
| RTS-615 | POS    | <i>na</i>    | NEG    | <i>na</i>    | ND           |      |      |         | +           |             |      |       |     |      |       |
| RTS-619 | POS    | <i>na</i>    | NEG    | <i>na</i>    | 4.8          |      |      |         |             |             |      | +     |     |      | +     |
| RTS-620 | POS    | <i>na</i>    | NEG    | <i>na</i>    | 2.97         | +    |      | +       | +           |             |      |       |     |      |       |
| RTS-625 | POS    | <i>na</i>    | NEG    | <i>na</i>    | ND           | +    |      |         |             |             |      |       |     |      |       |
| RTS-628 | POS    | <i>na</i>    | NEG    | <i>na</i>    | ND           | +    |      |         |             |             |      |       |     |      |       |
| RTS-633 | POS    | <i>na</i>    | NEG    | <i>na</i>    | ND           | +    |      | +       |             |             |      |       |     |      |       |

na - data not available; NEG - negative; ND - not done; + indicates TBD-Serochip signal intensity above threshold

**Supplementary Table 2.** List of IgG positive Lyme disease samples analyzed on the TBD-Serochip

| Sample   | WB IgM | WB IgM bands | WB IgG | WB IgG bands | C6 index CII | VisE | FlaB | OspC Nt | OspC type K | OspC Type M | P100 | BBK07 | Bdr | OppA | BBO03 |
|----------|--------|--------------|--------|--------------|--------------|------|------|---------|-------------|-------------|------|-------|-----|------|-------|
| RTS-913  | IND    | 1 BAND       | POS    | 6 BANDS      | 4.68         | +    |      |         |             |             |      | +     |     |      |       |
| RTS-914  | NEG    |              | POS    | 6 BANDS      | 4.8          | +    |      |         |             |             |      |       |     |      |       |
| RTS-915  | NEG    |              | POS    | 7 BANDS      | ND           | +    | +    |         |             |             |      | +     |     |      |       |
| RTS-916  | IND    | 1 BAND       | POS    | 7 BANDS      | ND           | +    |      |         |             |             |      |       |     |      |       |
| RTS-0202 | NEG    | <i>na</i>    | POS    | <i>na</i>    | ND           | +    | +    |         | +           |             |      |       |     |      |       |
| RTS-0204 | POS    | <i>na</i>    | POS    | <i>na</i>    | ND           | +    | +    |         |             |             |      |       |     |      |       |
| RTS-0205 | POS    | <i>na</i>    | POS    | <i>na</i>    | ND           | +    |      |         |             | +           |      |       |     |      |       |
| RTS-0206 | POS    | <i>na</i>    | POS    | <i>na</i>    | ND           | +    | +    |         |             |             |      | +     |     |      | +     |
| RTS-0207 | POS    | <i>na</i>    | POS    | <i>na</i>    | ND           | +    | +    |         |             |             |      | +     |     |      |       |
| RTS-0208 | POS    | <i>na</i>    | POS    | <i>na</i>    | ND           | +    | +    |         | +           |             |      |       |     |      |       |
| RTS-0209 | POS    | <i>na</i>    | POS    | <i>na</i>    | ND           | +    | +    |         |             |             |      | +     |     |      |       |
| RTS-0210 | POS    | <i>na</i>    | POS    | <i>na</i>    | ND           | +    | +    |         |             |             |      | +     |     |      | +     |
| RTS-0211 | POS    | <i>na</i>    | POS    | <i>na</i>    | ND           | +    | +    |         |             |             |      | +     |     |      |       |
| RTS-0212 | POS    | <i>na</i>    | POS    | <i>na</i>    | ND           | +    | +    |         |             |             |      | +     |     |      |       |
| RTS-0213 | POS    | <i>na</i>    | POS    | <i>na</i>    | ND           | +    | +    |         |             |             |      | +     |     |      |       |
| RTS-0219 | NEG    | <i>na</i>    | POS    | <i>na</i>    | ND           | +    | +    |         |             |             |      |       | +   |      | +     |
| RTS-0220 | POS    | <i>na</i>    | POS    | <i>na</i>    | ND           | +    | +    |         |             |             |      | +     |     |      |       |
| RTS-655  | POS    | <i>na</i>    | POS    | <i>na</i>    | 10           | +    | +    |         |             |             |      |       |     |      | +     |
| RTS-659  | NEG    | <i>na</i>    | POS    | <i>na</i>    | ND           | +    | +    |         | +           |             |      | +     |     |      |       |

na - data not available; NEG - negative; ND - not done; + sign indicates TBD-Serochip signal intensity above threshold

**Supplementary Table 3.** Reactivity of discriminatory epitopes for *B. burgdorferi* with Lyme disease positive sera from the CDC Research panel I

| Sample Category | Sample Group       | Acute/<br>Convalescent | EIA | IgM<br>WB | IgM<br>WB<br>bands | IgG | IgG<br>WB<br>Bands | 2-Tier<br>Interpretation | VisE | FlaB | OspC<br>Nt | OspC<br>type K | OspC<br>type M | P100 | BBK07 | Bdr | OppA | BBO03 |
|-----------------|--------------------|------------------------|-----|-----------|--------------------|-----|--------------------|--------------------------|------|------|------------|----------------|----------------|------|-------|-----|------|-------|
| Lyme disease    | Early Lyme-EM      | Acute                  | Neg | Neg       | -                  | Neg | 1                  | Neg                      | +    |      |            |                |                |      |       |     |      |       |
| Lyme disease    | Early Lyme-EM      | Acute                  | Neg | Neg       | -                  | Neg | 1                  | Neg                      |      |      |            |                |                |      |       |     |      | +     |
| Lyme disease    | Early Lyme-EM      | Acute                  | Neg | Neg       | -                  | Neg | 2                  | Neg                      | +    |      |            |                |                |      |       |     |      |       |
| Lyme disease    | Early Lyme-EM      | Acute                  | Neg | Pos       | 2                  | Neg | 2                  | Neg                      |      |      | +          |                |                | +    |       |     | +    | +     |
| Lyme disease    | Early Lyme-EM      | Convalescent           | Pos | Pos       | 2                  | Neg | 2                  | Pos                      | +    | +    |            |                |                |      | +     |     | +    |       |
| Lyme disease    | Early Lyme-EM      | Convalescent           | Pos | Pos       | 2                  | Neg | 4                  | Pos                      | +    |      |            |                | +              |      |       |     |      | +     |
| Lyme disease    | Early Lyme-EM      | Convalescent           | Pos | Pos       | 2                  | Pos | 5                  | Pos                      | +    |      |            | +              |                |      |       |     |      |       |
| Lyme disease    | Early Lyme-EM      | Convalescent           | Pos | Pos       | 3                  | Neg | 3                  | Pos                      | +    |      | +          |                |                | +    |       |     |      |       |
| Lyme disease    | Neurologic<br>Lyme | -                      | Pos | Pos       | 3                  | Pos | 5                  | Pos                      | +    | +    | +          |                |                | +    |       |     |      |       |
| Lyme disease    | Neurologic<br>Lyme | -                      | Pos | Pos       | 2                  | Pos | 10                 | Pos                      | +    | +    |            |                |                |      | +     |     |      | +     |
| Lyme disease    | Lyme arthritis     | -                      | Pos | Neg       | 1                  | Pos | 7                  | Pos                      | +    | +    |            |                |                | +    | +     |     |      | +     |
| Lyme disease    | Lyme arthritis     | -                      | Pos | Neg       | 1                  | Pos | 10                 | Pos                      | +    | +    |            |                |                |      | +     |     |      |       |

+ indicates TBD-Serochip signal intensity above threshold

**A**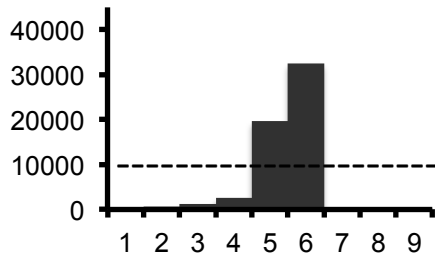**B**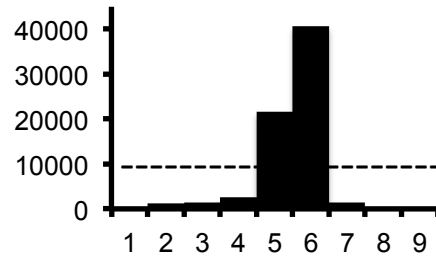**C**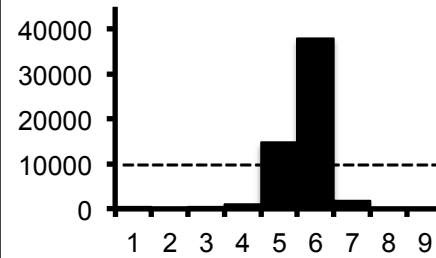**D**

| PEPTIDES |               |
|----------|---------------|
| 1        | EMKKDDQIAAAI  |
| 2        | MKKDDQIAAAIA  |
| 3        | KKDDQIAAAIAL  |
| 4        | KDDQIAAAIALR  |
| 5        | DDQIAAAIALRG  |
| 6        | DQIAAAIALRGM  |
| 7        | QIAAAIALRGMA  |
| 8        | IAAAIALRGMMAK |
| 9        | AAAIALRGMMAKD |

**Supplementary Figure 1.** Reproducibility of the TBD-Serochip. Shown are the data for the C6 region of the VlsE protein of *B. burgdorferi*. Panels A and B represent results from an early acute Lyme disease sera tested twice on the same serochip. Panel C shows the results from the same sample run on a different serochip. Y axis represents the intensity of the fluorescence signal, X axis represents 9 overlapping peptides within the C6 (panel D). Significant immunoreactive peptides are indicated in red. Dashed lines represent the threshold for the MKKDDQIAAAIALRGMA epitope
